# Supplementary material
Source: PubMed Central journal article supplement (PMC7253015)

## 1    **Supplementary Figures**

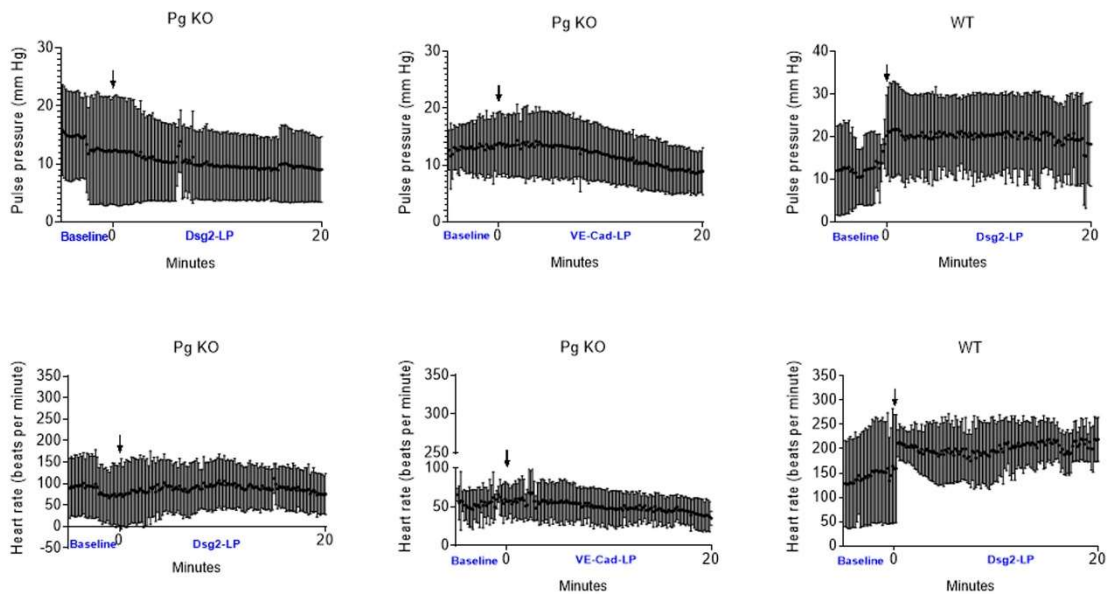

2

### 3    **Supplementary figure 1. Pulse pressure and heart rates measured in Langendorf** 4    **perfused Pg WT and KO hearts.**

5    Time course of pulse pressure (upper panel) and heart rate (lowe panel) of perfused hearts,  
6    from the same mice shown in figure 1, under baseline condition and after addition of Dsg2-LP.  
7    VE-Cad-LP served as peptide control. (n=5 mice for Dsg-LP and Pg KO and WT; n=3 mice for  
8    VE-Cad-LP). Arrow indicates the time point of addition of Dsg2-LP or VE-Cad-LP. Average of  
9    baseline values and 10 minutes of Dsg2-LP were compared. Two-tailed paired Student's t-test  
10    with 95 % confidence levels was performed and no significant changes were observed.

11

12

13

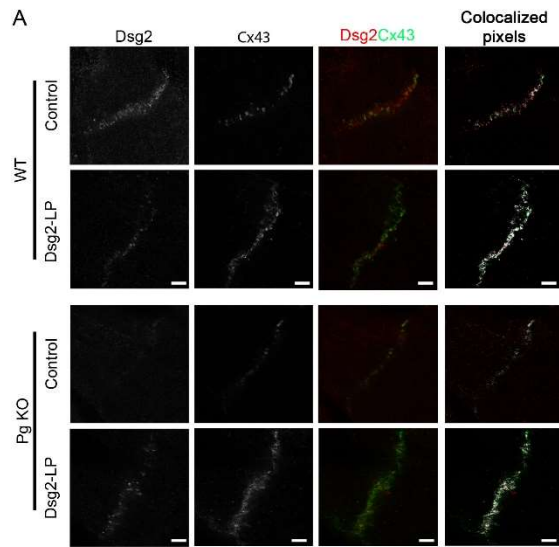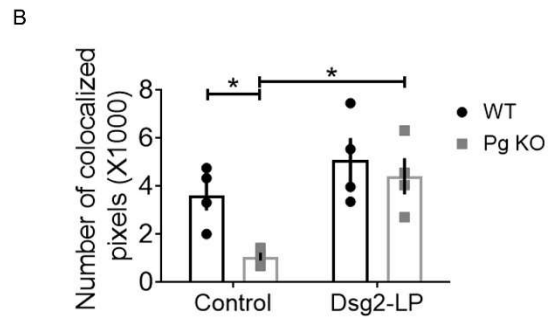

**Supplementary figure 2. Dsg2 and Cx43 membrane localization analyzed by STED microscopy in WT and Pg KO ventricular cardiac slices.**

**A**, STED images of ICDs of WT and Pg KO mice treated with Dsg2-LP for 1 hour and stained for Dsg2 (red) and Cx43 (green) (four ICDs per mouse were analyzed for quantification, n=4 mice per condition). Scale bar: 2µm. Colocalization of both proteins was analyzed and colocalized pixels are visualized in white. **B**, Quantification of colocalized pixels. \* $P < 0.05$ . Repeated measures two-way ANOVA with Sidak post-hoc test was performed.

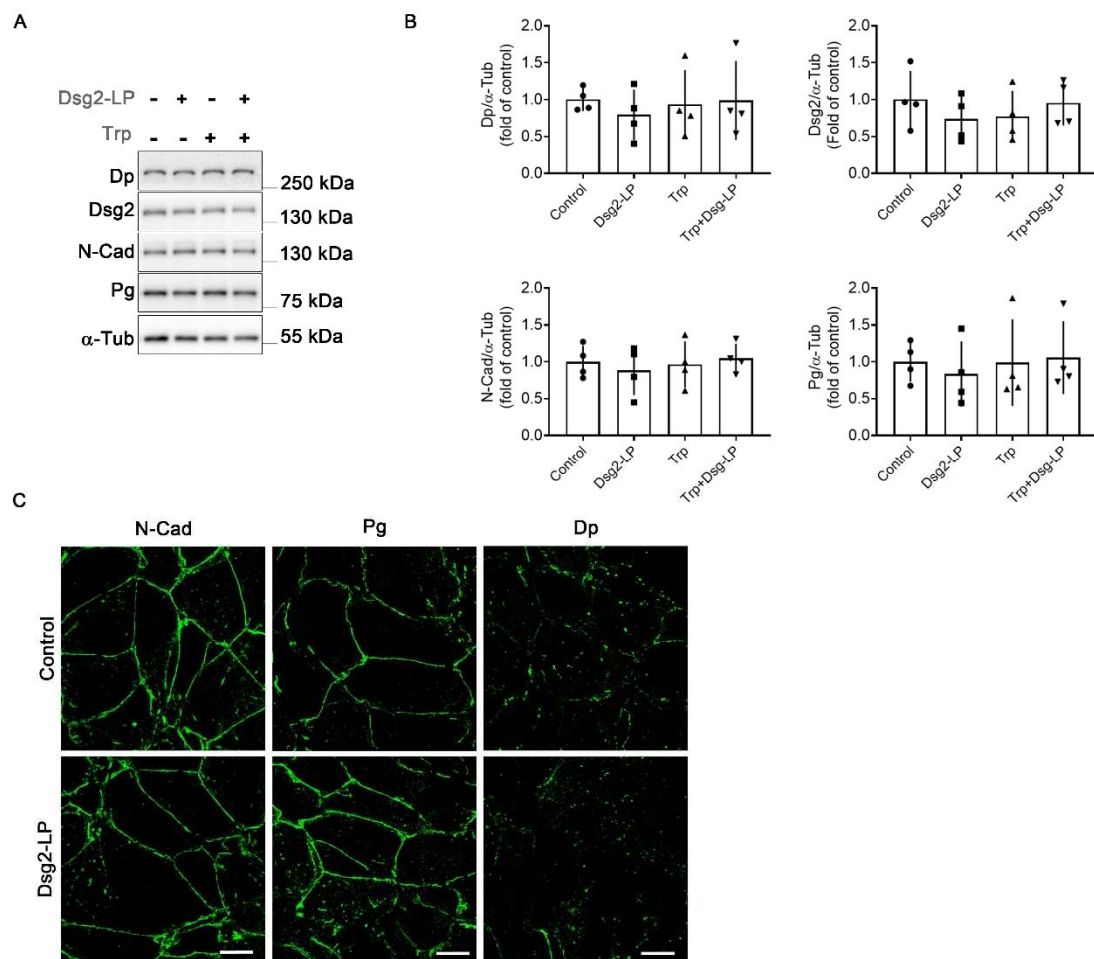

**Supplementary figure 3. Dsg2-LP did not alter desmosomal cadherin expression or localization in HL-1 cells.**

**A**, Western blot analysis of desmoplakin (Dp), desmoglein 2 (Dsg2), N-cadherin (N-Cad) or plakoglobin (Pg) after 24 h treatment with Dsg2-LP.  $\alpha$ -tubulin ( $\alpha$ -tub) was used as a loading control **B**, Quantitative analysis of Western blots performed in **A** (n=4). One-way ANOVA with Sidak post-hoc test was performed and no significant changes were observed. **C**, Representative immunostaining of HL-1 cells stained for N-Cad, Pg and Dp treated with Dsg2-LP for 24h (n=3), scale bar: 10 $\mu$ m.

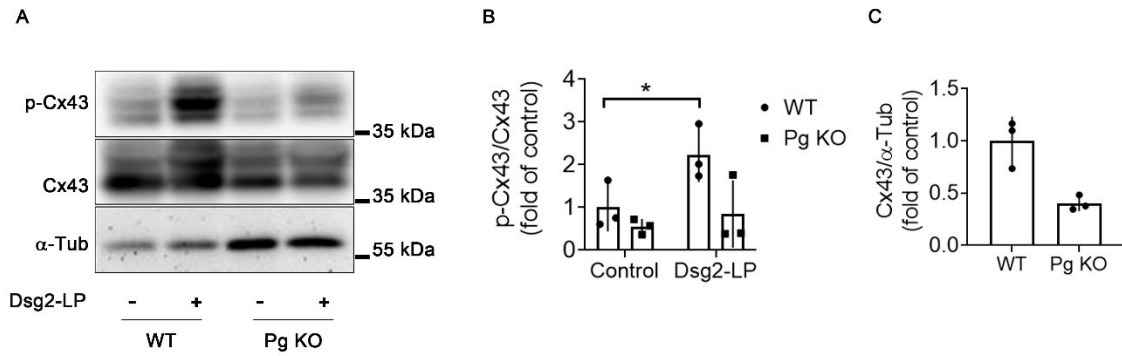

**Supplementary figure 4. Dsg2-LP mediated phosphorylation of Cx43 in WT and Pg KO ventricular cardiac slices.**

**A**, Western blot analysis of Cx43 phosphorylation at serine S368 (p-Cx43) and total Cx43 after 1 h treatment.  $\alpha$ -tubulin ( $\alpha$ -tub) was used as a loading control. **B**, **C**, Quantitative analysis of Western blots performed in **A** (n=3 mice per group). Two-way ANOVA with repeated measures and matching both factors with Sidak post-hoc test was performed for **B**. Two-tailed unpaired Student's t-test with 95 % confidence levels was performed for **C**.

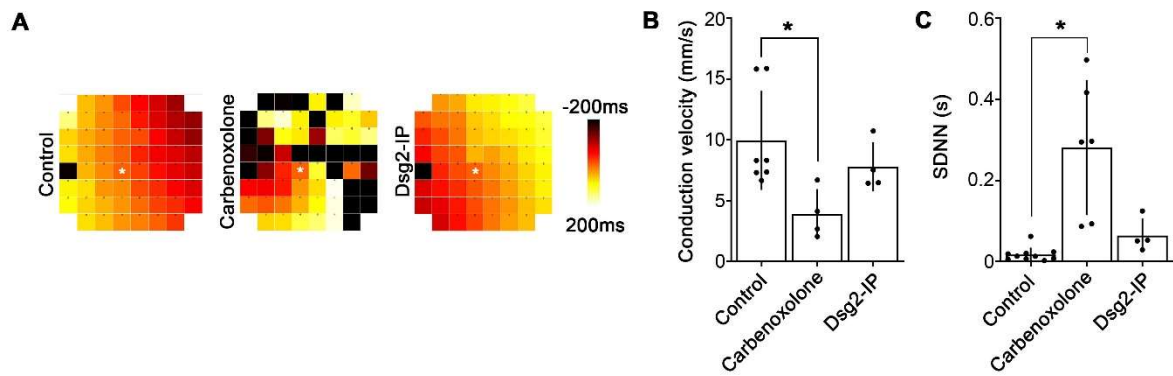

**Supplementary Figure 5. MEA of HL-1 cardiomyocyte treated with carbenoxolone or Dsg2-IP.**

**A**, Representative MEA heat maps of HL-1 cardiomyocytes treated with the GJ inhibitor carbenoxolone or the inhibitory peptide Dsg2-IP. Reference electrode is marked by (\*). **B**, **C**, Corresponding analysis of conduction velocity and standard deviation of beat-to-beat-intervals (SDNN) of MEA experiments described in **A** (n=3). \* $P < 0.05$ . One-way ANOVA with Dunnett post-hoc test.

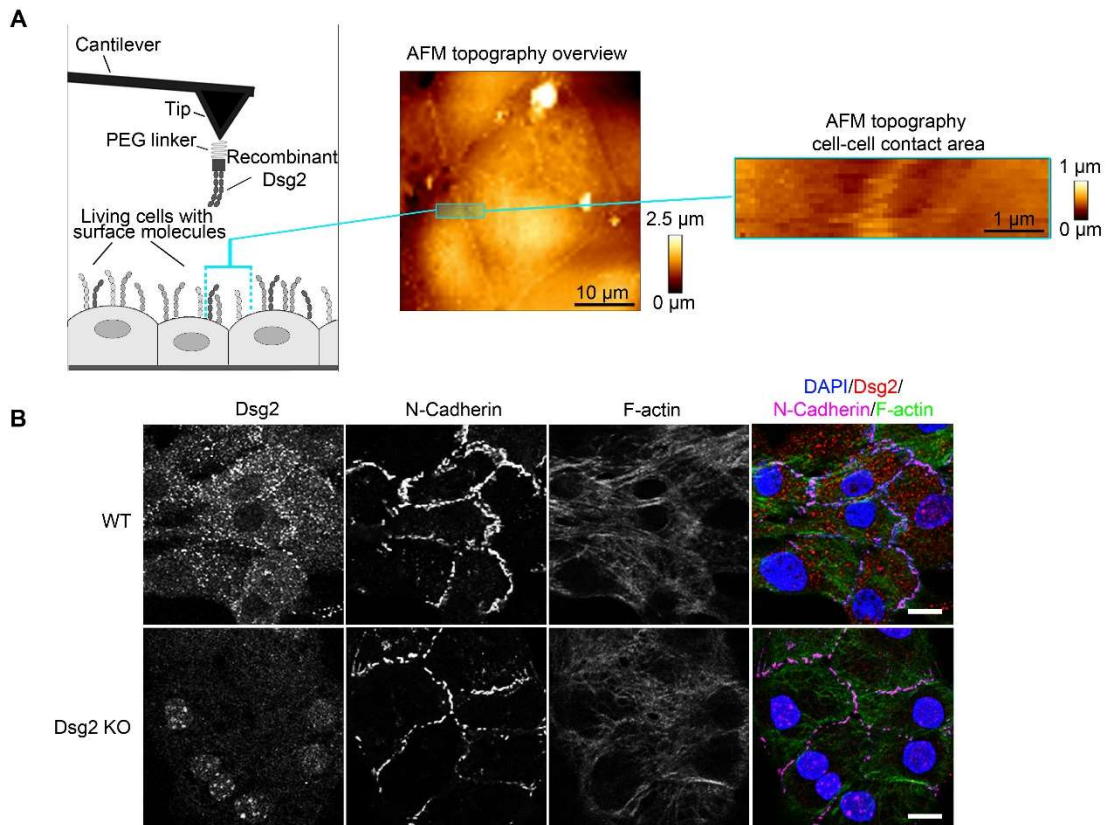

## Supplementary Figure 6. AFM force mapping on living cardiomyocytes.

**A**, Schematic of AFM set-up on living cells. An area spanning the cell-cell border (marked in cyan) was selected for force spectroscopy as shown in the overview topography image. Scale bar overview: 10 $\mu\text{m}$ ; insert: 1 $\mu\text{m}$ . **B**, Representative immunostaining of cardiomyocytes isolated from neonatal Dsg2 KO mice and WT littermates stained for Dsg2 (red), N-cadherin (magenta), F-actin (green) and the nucleus (DAPI, blue) paralleled to AFM experiments shown in Fig. 5 (n=7 mice per phenotype). Scale bar: 10 $\mu\text{m}$ .

Full Unedited gel for Figure 3B

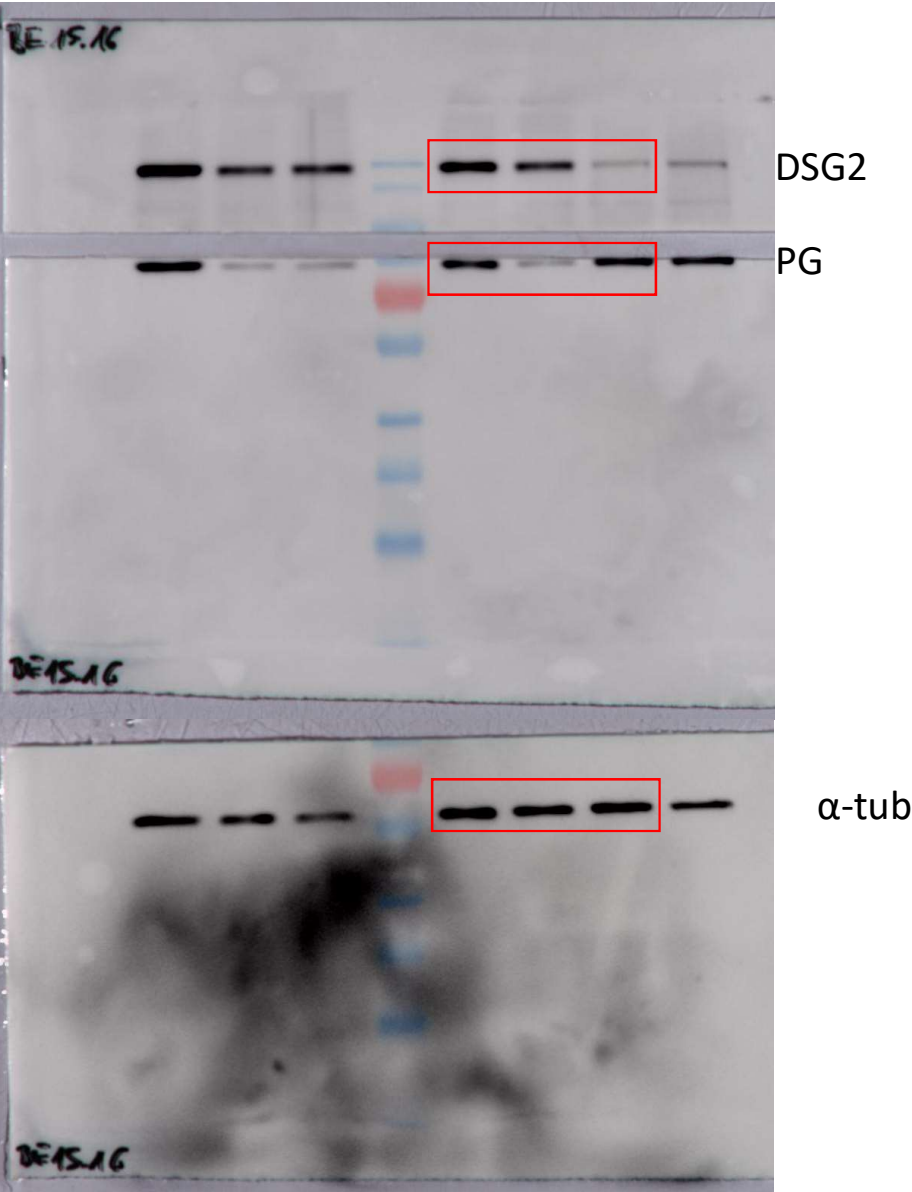

Full Unedited gel for Figure 4I

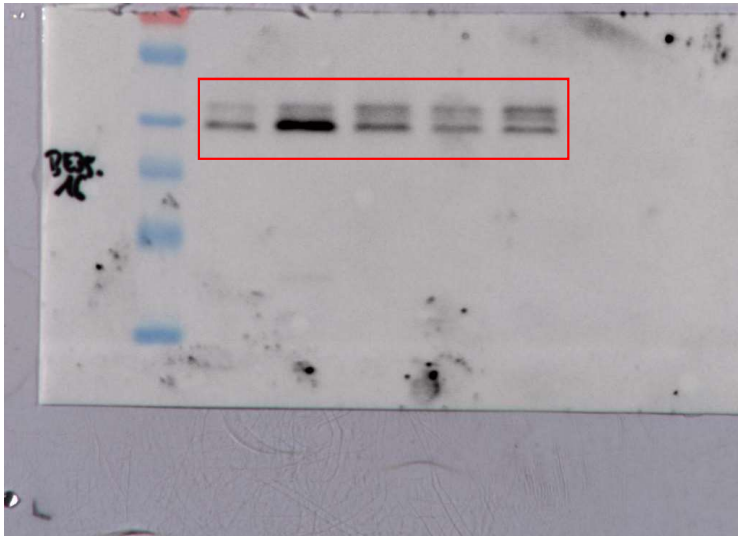

pCx43 S368

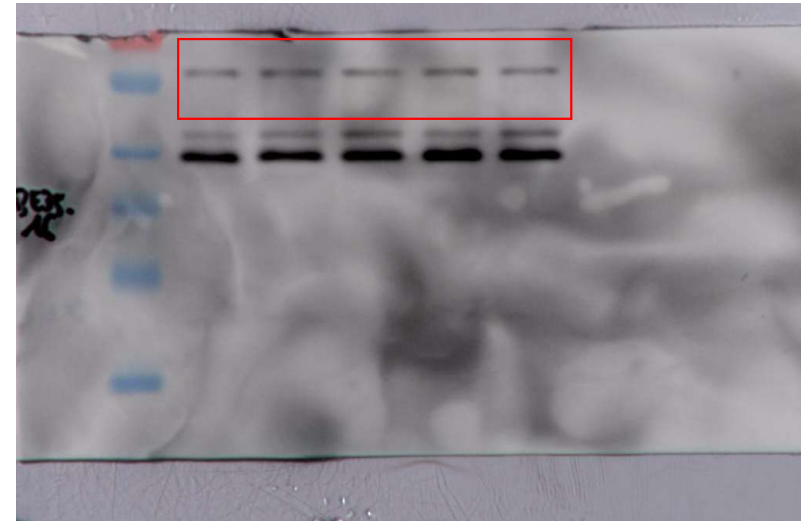

α-tub

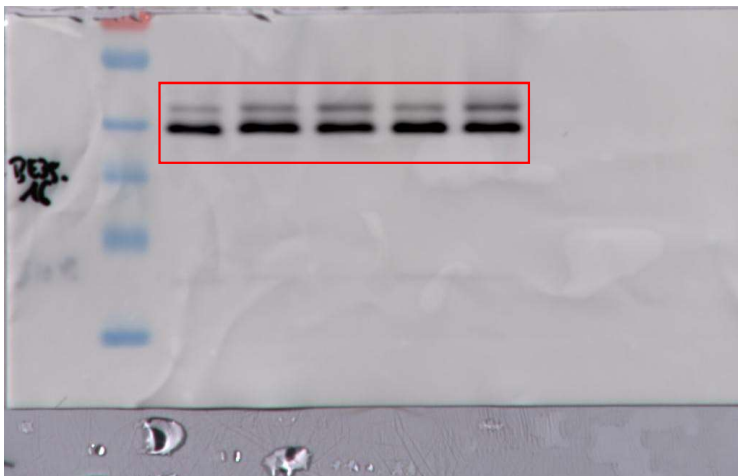

Total Cx43

Full Unedited gel for Figure 4J

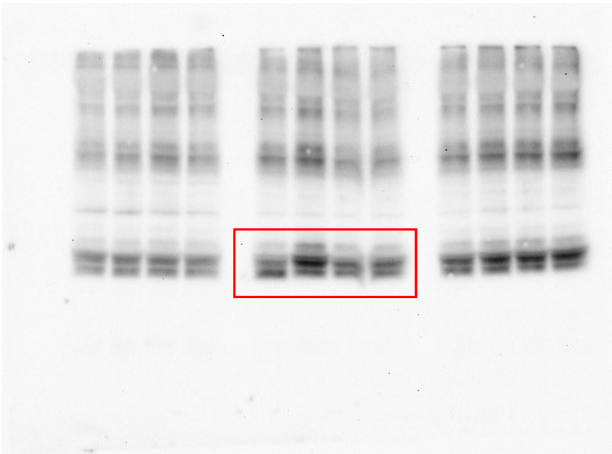

pCx43 S368

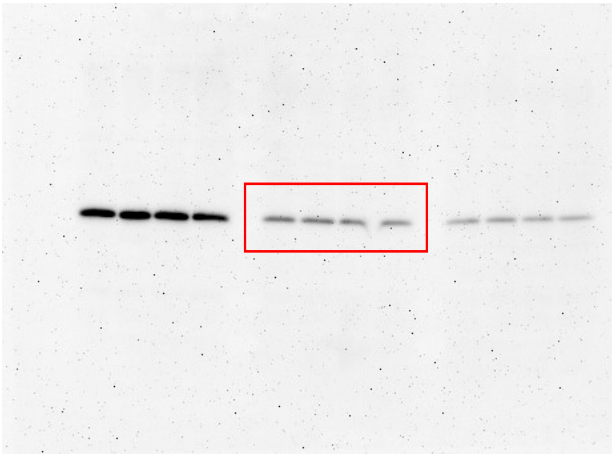

$\alpha$ -tub

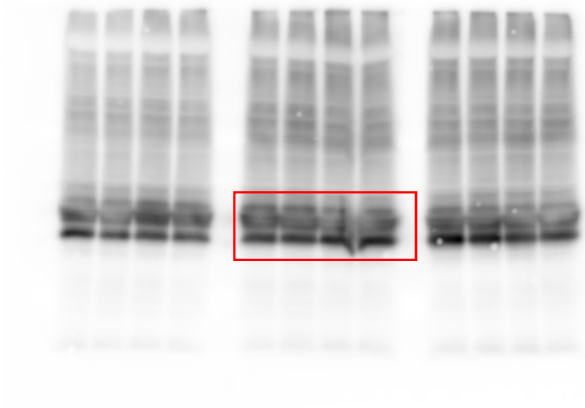

Total Cx43

Full Unedited gel for Figure 7A

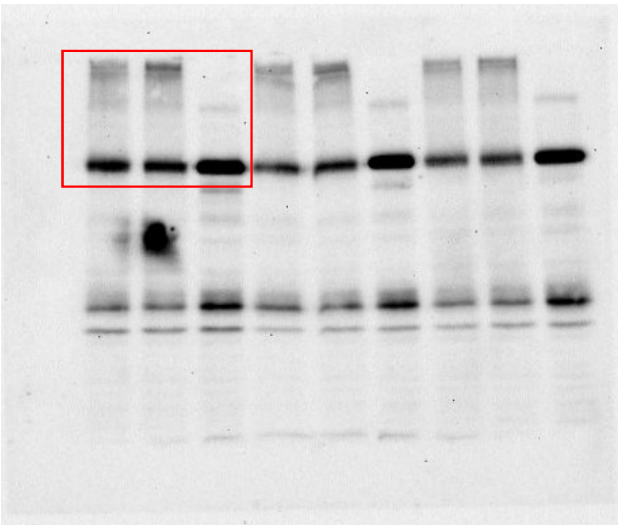

Dsg2

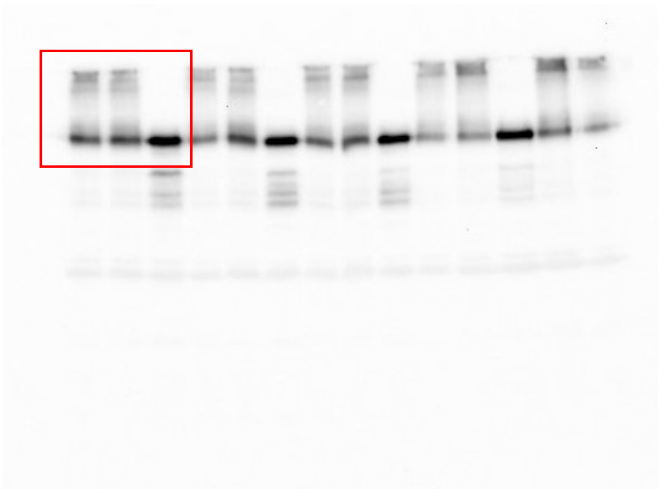

N-Cad

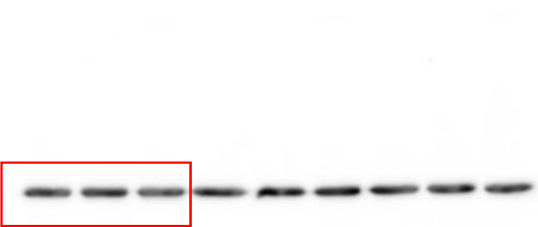

$\alpha$ -tub

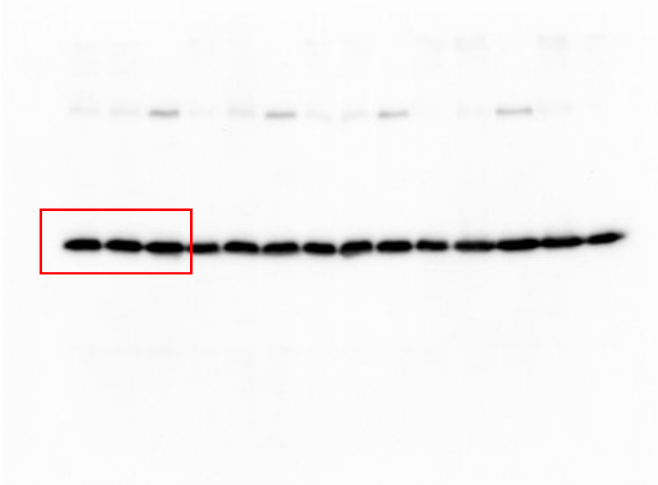

$\alpha$ -tub

Full Unedited gel for Supplementary figure 3A

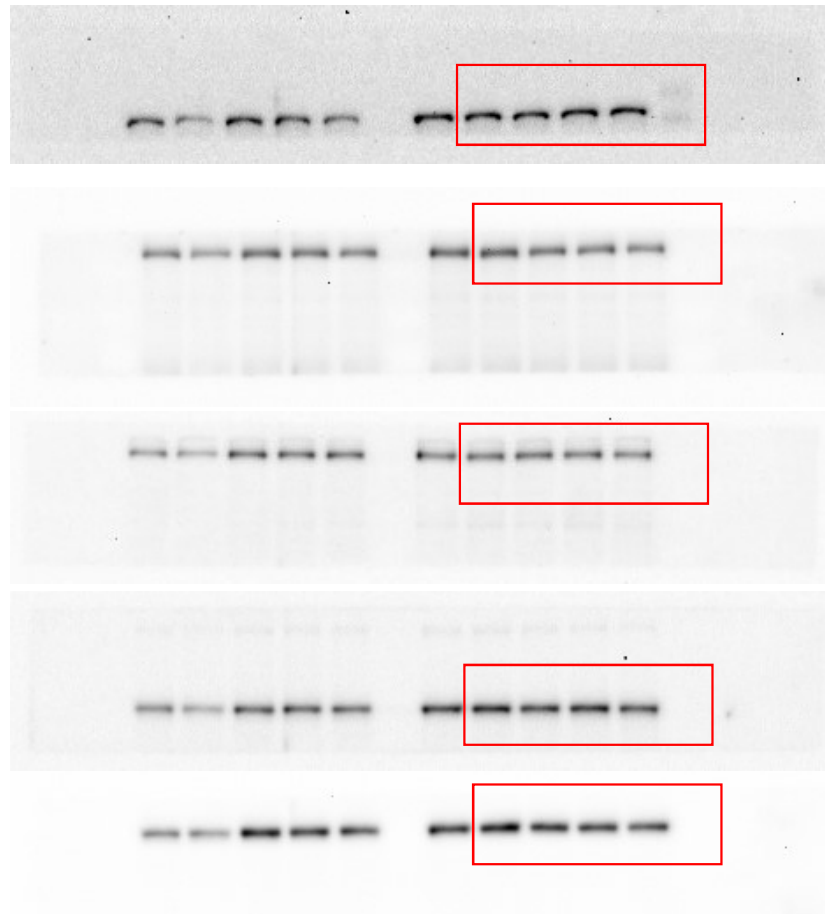

Dp

Dsg2

N-Cad

Pg

$\alpha$ -tub

Full Unedited gel for Supplementary figure 4A

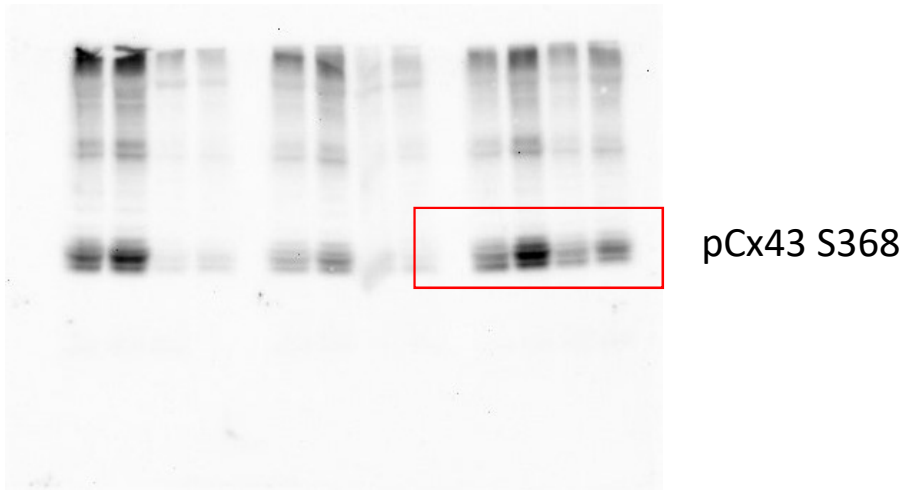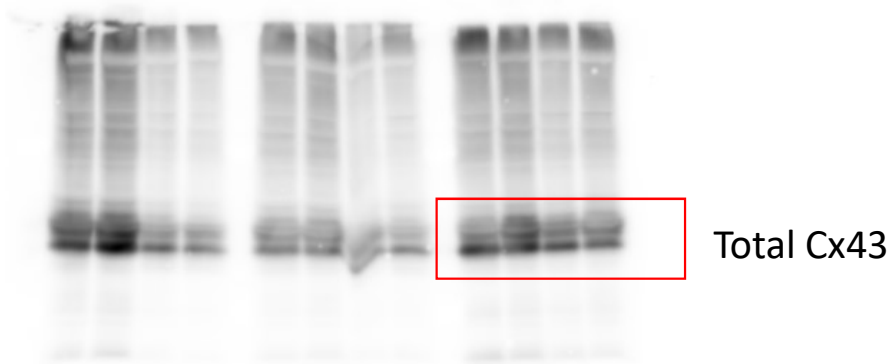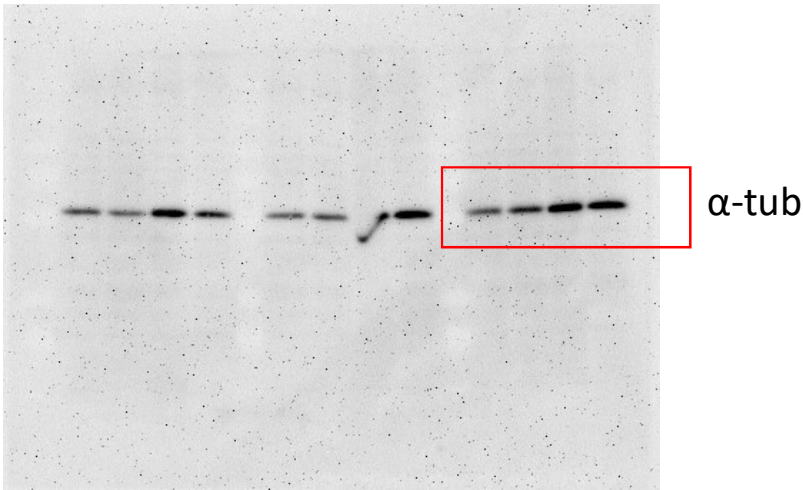

Supplement: jciinsight-5-130141-s050.pdf [file jciinsight-5-130141-s050.pdf]
